1 **Title:**

2 Biogeography masks diet-induced shifts in the bacterial community associated with

3 larvae of the sea urchin *Strongylocentrotus droebachiensis*

4

5 **Running title:**

6 Population-specific microbiome of urchin larvae

7

8 **Authors:**

9 Tyler J. Carrier<sup>1,\*</sup>, Sam Dupont<sup>2</sup>, and Adam M. Reitzel<sup>1</sup>

10

11 **Affiliations:**

12 <sup>1</sup> Department of Biological Sciences, University of North Carolina at Charlotte, 9201

13 University City Blvd., Charlotte, NC 28223 USA

14 <sup>2</sup> Department of Biological and Environmental Sciences, University of Gothenburg, The

15 Sven Lovén Centre for Marine Infrastructure, Kristineberg, Sweden

16 \* Corresponding author: [tcarrier1@uncc.edu](mailto:tcarrier1@uncc.edu)

17

18 **Keywords:**

19 Microbiome; host-microbe; ecology; plasticity; echinopluteus; symbiosis

20

21 **Subject Category:**

22 Microbial population and community ecology

23

24 **Abstract**

25           Animals acclimate to changes in their environment through diverse responses,  
26 including phenotypic plasticity and shifts in their microbiome. These microbial  
27 communities are also taxonomically distinct across the geographical distribution of the  
28 host. It is less known, however, whether taxonomic differences in host-associated  
29 bacterial communities between geographically distinct populations mask shifts due to  
30 environmental changes within a population. We tested for potential ecological masking  
31 using larvae of the echinoid *Strongylocentrotus droebachiensis* from three coastal  
32 locations in the Pacific and Atlantic Oceans that were exposed to four feeding regimes.  
33 When considering OTU membership and the relative proportion of those taxa, the  
34 composition of the larval-associated bacterial communities were best explained by  
35 location, not feeding regime. Similarly, predicted metagenomic gene profiles from these  
36 bacterial communities were congruent with population specificity and may suggest a role  
37 in metabolism. We hypothesize that, while much of the differences in the bacterial  
38 communities is related to the large geographic distances between these locations, the  
39 predicted overlapping functions of the microbiome may relate to responding to ecological  
40 variation experienced by these larvae. Taken together, these results suggest that  
41 differences in community composition between populations masks local variation, and  
42 that scaling should be considered in when studying microbiome dynamics.

43

## 44 **Introduction**

45           Acclimating to environmental variability through morphological, developmental,  
46 and/or physiological plasticity is a common trait of animals (Boidron-Metairon 1988,  
47 Bradshaw 1965, DeWitt et al 1998, Miner et al 2005, Schlichting and Smith 2002, Sterns  
48 1989, West-Eberhard 2003). Over the past decade, the appreciation for the role that  
49 animal-associated microbial communities play in ameliorating environment-induced  
50 stress has grown profoundly (Aprill 2017, Carrier and Reitzel 2017, Carrier and Reitzel  
51 2018, Kohl and Carey 2016, Macke et al 2016, Shapira 2016, Theis et al 2016). When  
52 experiencing a heterogeneous environment, the animal host may recruit, expel, and/or  
53 shuffle the relative proportion of associated microbiota (Bordenstein and Theis 2015,  
54 Zilber-Rosenberg and Rosenberg 2008), to assemble a community with particular  
55 molecular pathways for the environmental conditions (Burke et al 2011, Louca et al  
56 2016, Roth-Schulze et al 2018).

57           Microbial communities associated with animals often vary in response to diverse  
58 abiotic and biotic factors, including temperature, salinity, diet quality and quantity,  
59 season, and habitat-type (see reviews by Carrier and Reitzel 2017, Kohl and Carey 2016).  
60 Of these, dietary responses are best studied and have a major impact on the composition  
61 of and potential mutualistic functions for this community (David et al 2014, Kohl and  
62 Dearing 2012, Rosenberg and Zilber-Rosenberg 2016, Sonnenburg et al 2016). When  
63 faced with prolonged food deprivation, for example, the community composition and  
64 diversity of microbiota associated with both invertebrate and vertebrate hosts shift  
65 considerably (Carrier and Reitzel 2018, Kohl et al 2014), a response hypothesized to  
66 buffer against reduced exogenous nutrients.

67           Microbial communities associated with animals are also species-specific (Carrier  
68 and Reitzel 2018, Fraune and Bosch 2007, Schmitt et al 2012) and taxonomically  
69 variable across the geographical distribution of the host species (Dishaw et al 2014,  
70 Huang et al 2018, Marino et al 2017, Marzinelli et al 2015, Mortzfeld et al 2015).  
71 Habitat-specific microbial communities are primarily controlled by environmental  
72 conditions (Pantos et al 2015) and diverge with respect to dispersal limitations (Moeller  
73 et al 2017). Despite this taxonomic variation, microbial communities can remain  
74 functionally similar due to shared genes across bacterial species (Roth-Schulze et al  
75 2018). The bacterial communities of the green alga *Ulva* spp., for example, are too  
76 variable to define a ‘core’ community; however, nearly 70% of the microbial genes are  
77 biogeographically consistent (Roth-Schulze et al 2018). How components of host ecology  
78 attribute to the taxonomic variation in these bacterial communities is less understood and  
79 are needed to identify the relative strength and importance of each abiotic or biotic factor.

80           Planktotrophic (feeding) larvae are one biological system to compare the  
81 components of host ecology and their dynamics on animal microbial communities. At a  
82 local scale, many planktotrophic larvae (*e.g.*, the pluteus of sea urchins) inhabit  
83 heterogeneous feeding environments and are morphologically and physiologically plastic  
84 to food availability (Adams et al 2011, Boidron-Metairon 1988, Byrne et al 2008, Carrier  
85 et al 2015, Hart and Strathmann 1994, McAlister and Miner 2018, Miner 2004, Miner  
86 2011, Soars et al 2009). Feeding-induced plasticity in the echinoid *Strongylocentrotus*  
87 *droebachiensis*, specifically, is correlated with phenotype-, diet-, and development-  
88 specific bacterial communities (Carrier and Reitzel 2018). At a regional scale, adult *S.*  
89 *droebachiensis* have an Arctic-boreal distribution (Scheibling and Hatcher 2013) and can

90 be divided into genetically distinct populations across multiple oceans (Addison and Hart  
91 2004, Addison and Hart 2005). Attributes of the reproductive biology of *S.*  
92 *droebachiensis* (e.g., sperm morphology) have significant phenotypic variation between  
93 populations, suggesting potential directional selection (Manier and Palumbi 2008, Marks  
94 et al 2008). How these differences in reproductive characteristics relate to the variation in  
95 other phenotypic traits, such as larval morphological plasticity or symbioses with bacteria  
96 have not been studied, although population-specific variation and differential selection  
97 would not be surprising given the differences experienced in their natural environments.

98         The ability of *S. droebachiensis* larval holobionts to acclimate to local feeding  
99 variation across its broad geographic distribution was used as a biological system to  
100 evaluate local versus regional effects. Specially, using *S. droebachiensis* larvae, we tested  
101 the hypothesis that host geographical origin better correlates with community  
102 composition than does local variations on food availability, and that the predicted  
103 functional gene profiles converge between host habitats. To test these hypotheses, *S.*  
104 *droebachiensis* larvae from three sites (Figure 1) were differentially fed, and the  
105 associated bacterial communities were assayed and used to coarsely predict functions of  
106 the metagenome.

107

## 108 **Experimental Procedures**

### 109 *Adult urchin collection and larval rearing*

110         Adult *S. droebachiensis* were collected from populations in the North Sea in  
111 March 2015, the Salish Sea in April 2016, and the Gulf of Maine in February 2017  
112 (Figure 1). Individuals from the North Sea were collected by divers in Droebak, Norway

113 (59°39' N, 10°37' E) and transported in cold and aerated seawater to the Sven Lovén  
114 Centre for Marine Infrastructure (Kristineberg, Sweden). Urchins were maintained in  
115 natural seawater and fed *ad libitum* on a live mix of *Ulva lactuca* and *Laminaria* spp.  
116 collected from the Kristineberg shoreline. Urchins from the Salish Sea were hand-  
117 collected at low tide at Cattle Point, San Juan Island, USA (48°27' N, 122°57' W),  
118 transferred to the Friday Harbor Laboratories within one hour, suspended in sub-tidal  
119 cages off the dock at FHL, and fed *Nereocystis* spp. *ad libitum* until spawning two weeks  
120 later. Lastly, individuals from the Gulf of Maine were collected from Frenchman Bay,  
121 Maine (44°25' N 68°12' W), shipped overnight to the Darling Marine Center, and were  
122 maintained in flow-through aquaria and fed *Saccharina latissima ad libitum* until  
123 spawning within one week.

124 Adult urchins were spawned with a one- to two-mL intracoelomic injection of  
125 0.50 M KCl. For each population, gametes from three males and three females were  
126 separately pooled. Fertilization of eggs and larval rearing followed Strathmann (1987),  
127 except, to include the environmental microbiota, embryos and larvae were reared using  
128 5.0- $\mu\text{m}$  filtered seawater (FSW). Briefly, embryos were incubated in one-liter of FSW at  
129 ambient temperature and salinity, and two hours post-fertilization were transferred to  
130 three or five-L of FSW, divided into triplicates, and larval density was adjusted to two  
131 larvae $\cdot\text{mL}^{-1}$  and subsequently diluted as larvae reached the 6- and 8-armed stages. Larval  
132 cultures were given 90 to 95% water changes every other day by reverse filtration.

133 Monocultures of *Rhodomonas lens* were grown at room temperature with f/2  
134 media and a combination of ambient and artificial lighting (Guillard 1975).

135

136 *Experimental feeding and larval morphometrics*

137 At 48 hours post-fertilization, prism-stage larvae were divided into three replicate  
138 jars for each of the four experimental feeding treatments varying in *R. lens* quantity:  
139 10,000, 1,000, 100, or 0 cells•mL<sup>-1</sup>. For each experiment, larvae fed 10,000 cells•mL<sup>-1</sup>  
140 were reared through metamorphosis while diet-restricted and started larvae were cultured  
141 until developmental stasis (Supplemental Table 1). Larvae (n=100) from each replicate  
142 for each treatment were sampled weekly. Immediately after sampling, larval samples  
143 were concentrated into a pellet using a microcentrifuge and all seawater was removed.  
144 Pelleted larvae were then preserved in RNAlater and stored at -20 °C before DNA  
145 extractions.

146 Complementary to sampling *S. droebachiensis* larvae, the environmental  
147 microbiota from the seawater was also sampled. When larval cultures were sampled  
148 weekly, triplicates of ~1-L of seawater was filtered onto a 0.22-µm Millipore filter to  
149 retain the environmental microbiota. Full filter disks were then preserved in RNAlater  
150 and stored at -20 °C before DNA extractions.

151 In addition to sampling larvae to assay the associated bacterial communities,  
152 twenty larvae (n=20) from a single replicate from each dietary treatment were sampled  
153 for morphometric analysis. Larvae were imaged using a compound microscope (Salish  
154 Sea: Nikon Eclipse E600; camera: QImaging MicroPublisher 5.0 RTV; Gulf of Maine:  
155 Zeiss Primo Star HD digital microscope; North Sea: Leica stereomicroscope) and  
156 morphometrics (length of larval body, post-oral arms, and stomach area; Supplementary  
157 Figures 1-2) were measured using ImageJ, v. 1.9.2 (Schneider et al 2012). We tested  
158 whether larval morphology and stomach volume were influenced by differential feeding

159 over time using a two-way ANOVA (JMP Pro v. 13), and a whether this pattern was site-  
160 specific using a one-way ANOVA. Where statistical differences were observed ( $p < 0.05$ ),  
161 we used a post-hoc test to determine the affect at each time point and for each diet.

162

### 163 *Assaying microbial communities*

164 We extracted total DNA from larval samples using the GeneJet Genomic DNA  
165 Purification Kit (Thermo Scientific). For filtered seawater samples, we extracted eDNA  
166 using the FastDNA Spin Kit for Soil (MP Biomedical). DNA was then quantified using  
167 the NanoDrop 2000 UV-Vis Spectrophotometer (Thermo Scientific) and diluted to 5  
168  $\text{ng} \cdot \mu\text{L}^{-1}$  using RNase/DNase-free water.

169 Bacterial sequences were amplified using ‘universal’ primers for the V3/V4  
170 regions of the 16S rRNA gene (Forward: 5’ CTACGGGNGGCWGCAG, Reverse: 5’  
171 GACTACHVGGGTATCTAATCC) developed by (Klindworth et al 2013). Products  
172 were purified using the Axygen AxyPrep Mag PCR Clean-up Kit (Axygen Scientific),  
173 indexed via PCR using the Nextera XT Index Kit V2 (Illumina Inc.), and then purified  
174 again. At each of these steps, fluorometric quantitation was performed using a Qubit  
175 (Life Technologies) and libraries were validated using a Bioanalyzer High Sensitivity  
176 DNA chip (Agilent Technologies). Illumina MiSeq sequencing (v3, 600 cycles) was  
177 performed at the University of North Carolina at Charlotte.

178 Forward and reverse sequences were paired and trimmed using PEAR (Zhang et  
179 al 2014) and Trimmomatic (Bolger et al 2014), respectively, converted from fastq to fasta  
180 using custom script (Supplemental Note 1), and, prior to analysis of bacterial 16S rRNA  
181 sequences, chimeric sequences were detected using USEARCH (Edgar et al 2011) and



182 removed using filter\_fasta.py. Using QIIME 1.9.1 (Caporaso et al 2010), bacterial 16S  
183 rRNA sequences were analyzed and grouped into operational taxonomic units (OTUs)  
184 based on a minimum 97% similarity. The biom table generated by the  
185 pick\_open\_reference\_otus.py script was filtered of OTUs with less than ten reads as well  
186 as sequences matching chloroplast for cryptophytes (*i.e.*, *R. lens*; after (Carrier and  
187 Reitzel 2018).

188 Using the filtered biom table and “biom summarize-table” function to count total  
189 sequences per sample, the rarefaction depth of 3,193 was determined and applied to all  
190 subsequent analyses (Supplemental Figure 1). Beta diversity was calculated using the  
191 weighted UniFrac (Lozupone and Knight 2005), and principal coordinate analyses  
192 (PCoA) were visualized in EMPeror (Vazquez-Baeza et al 2013) and recreated using  
193 PhyloToAST (Dabdoub et al 2016) or stylized for presentation in Adobe Illustrator CS6.  
194 Community composition was generated using summarize\_taxa\_through\_plots.py script  
195 and visualized using Prism 7 (GraphPad Software). Community similarity across  
196 phenotypes, dietary states, and developmental stages were compared statistically using an  
197 ANOSIM as part of the compare\_categories.py script.

198 A step-by-step listing of QIIME scripts used to convert raw reads to OTUs for  
199 visualization of the data is located in Supplementary Note 1.

200

### 201 *Functional predictions using PICTUS*

202 For the QIIME-generated OTU (*i.e.*, biom) table to be compatible with PICTUS  
203 (Langille et al 2013), all *de novo* OTUs were filtered according to the Greengenes (v.  
204 13.5) database. Closed OTU tables (that retained 57.8% and 88.2% of OTUs from full

205 and ‘shared’ communities, respectively) were normalized by copy number, upon which  
206 metagenomic gene profiles were predicted and categorized by biological function. The  
207 PICTUS output was made compatible for STAMP using `biom_to_stamp.py` from  
208 Microbiome Helper (Comeau et al 2017). These metadata were subsequently analyzed  
209 using STAMP (Parks et al 2014) to test for a population-specific predicted functional  
210 profile. The principle coordinate from STAMP were compared statistically using a one-  
211 way ANOVA (JMP Pro, ver. 13), as part of the STAMP package. We then generated taxa  
212 plots for Gene Ontology groups of interest using `metagenome_contributions.py` and  
213 custom scripts.

214 A step-by-step listing of PICTUS scripts used to convert from QIIME and the  
215 subsequent data analysis is located in Supplementary Note 1.

216

## 217 **Results**

### 218 *Larval holobionts and the feeding environment*

219 Diet-induced morphological plasticity was recorded for *S. droebachiensis* larvae  
220 from each population, with the pattern of expression being location-specific (ANOVA,  
221  $p < 0.0001$ ; Supplemental Figures 2-3). Diet-restricted larvae from the Salish Sea and Gulf  
222 of Maine exhibited a higher post-oral arm to mid-body line ratio than *ad libitum*  
223 counterparts (ANOVA,  $p < 0.0001$ ; Supplemental Figure 2; Supplemental Table 2), even  
224 though analyses of Gulf of Maine larvae were confounded by developmental stage  
225 (Supplemental Table 1). Larvae from the North Sea, however, exhibited the opposite  
226 response: *ad libitum* feeding induced a higher post-oral arm to mid-body line ratio than  
227 diet-restriction (ANOVA,  $p < 0.0001$ ; Supplemental Figure 2; Supplemental Table 2).

228 *S. droebachiensis* larvae from each population associated with a diet-specific  
229 bacterial community (Supplemental Figures 4-6; ANOSIM, Supplemental Table 4).  
230 Larvae from the Salish Sea and Gulf of Maine exhibited similar diet-specific community-  
231 level patterns (Supplemental Figures 4-5; ANOSIM, Supplemental Table 4), where the  
232 bacterial consortium of food-restricted individuals generally were more similar to each  
233 other than to well-fed counterparts. Larvae from the North Sea, on the other hand,  
234 exhibited the opposite response (Supplemental Figure 6), where diet-specific bacterial  
235 communities were still observed (ANOSIM, Supplemental Table 4) except that all food  
236 rations were more similar to each other than to starved individuals (Supplemental Figure  
237 6). In addition to diet-specificity, larvae from each population associated with bacterial  
238 communities that were specific to phenotype (Supplemental Figure 7; ANOSIM,  
239 Supplemental Table 4) as well as varied with developmental stage and/or  
240 ecological/stochastic drift (Supplemental Figure 8-10; ANOSIM, Supplemental Table 4)  
241 and were distinct from the environmental bacterial community (Supplemental Figure 11;  
242 ANOSIM, Supplemental Table 4).

243

#### 244 *Location-specific bacterial communities*

245 Variation in OTU diversity and the relative proportions of those taxa associated  
246 with *S. droebachiensis* larvae were best correlated with geography (ANOSIM,  $p < 0.001$ ;  
247 Figure 2), where larvae from the Western and Eastern Atlantic Ocean were more similar  
248 to each other than to those from the Pacific Ocean (Figure 2; Supplemental Figure 12A).  
249 Site-specific bacterial communities of *S. droebachiensis* larvae were independent of  
250 plasticity state, developmental stage, and feeding regime (Figure 2; Supplemental Figures

251 4-10, 13-14; Supplemental Table 2), even though larvae at each site associated with  
252 phenotype- (Supplemental Figure 7), diet- (Supplemental Figure 8-10), and development-  
253 (Supplemental Figure 4-6) specific bacterial communities (Supplemental Table 2).  
254 Moreover, the structure of the bacterial community associated with Gulf of Maine larvae  
255 are taxonomically richer and the most diverse while larvae from the Salish Sea were the  
256 least rich and diverse, leaving those from the North Sea as intermediate (Table 1).

257         Of the thousands of OTUs associated with *S. droebachiensis* larvae across sites,  
258 phenotypes, developmental stages, and diets, ~32.7% were found in at least one sample at  
259 each of the three sites (Supplemental Figure 15). Moreover, ~8.1% to ~13.0% of all  
260 OTUs were shared between two sites, and ~10.8% to ~12.7% were unique to a single site  
261 (Supplemental Figure 15). When clustered by bacterial classes, *S. droebachiensis* larvae  
262 from the North Sea primarily associate with  $\gamma$ -proteobacteria (34.2%; Phylum:  
263 Proteobacteria),  $\alpha$ -proteobacteria (26.8%; Phylum: Proteobacteria), Flavobacteriia  
264 (19.5%; Phylum: Bacteroidetes), and Saprospirae (12.3%; Phylum: Bacteroidetes), while  
265 larvae from the Gulf of Maine primarily associated with  $\gamma$ -proteobacteria (49.1%),  $\alpha$ -  
266 proteobacteria (17.8%), Flavobacteriia (17.7%), and, lastly, larvae from the Salish Sea  
267 primarily associate with Flavobacteriia (44.3%),  $\alpha$ -proteobacteria (23.2%), and  $\gamma$ -  
268 proteobacteria (20.0%) (Supplemental Figure 15).

269

#### 270 *Dynamics of shared taxa*

271         For balanced inter-population comparisons, only OTUs in at least one sample  
272 from each population were retained. This restriction yielded 4,502 shared OTUs  
273 (Supplemental Figure 15), which were divided by population and subsequently filtered to

274 only include ‘core’ taxa (*i.e.*, those found in all samples for a given urchin population).  
275 Inclusion of the ‘core’ OTUs for each population totaled 178 OTUs (Supplemental Figure  
276 16). An unweighted and weighted comparison of these OTUs suggest that these ‘core’  
277 communities associated with *S. droebachiensis* larvae is, again, best correlated with  
278 geography (ANOSIM,  $p < 0.001$ ; Figure 3), with larvae from the Atlantic Ocean being  
279 more similar to each other than larvae from the Pacific Ocean (Figure 3; Supplemental  
280 Figure 12B).

281 Of the combined ‘core’ bacterial communities associated with *S. droebachiensis*  
282 larvae, three OTUs (~1.8%) were found in all samples within and between populations:  
283 an unclassified species in the class  $\gamma$ -proteobacteria (OTU number: 1106577), an  
284 unclassified species in the family Flavobacteriaceae (OTU number: 1105269), and an  
285 unclassified species in the genus *Polaribacter* (OTU number: 586650). Of the 178 OTUs,  
286 27 OTUs were shared between North Sea and Gulf of Maine samples, four between all  
287 Gulf of Maine and Salish Sea samples, and three between all Salish Sea and North Sea  
288 samples (Supplemental Figure 16). Furthermore, 6, 52, and 78 OTUs were specific to *S.*  
289 *droebachiensis* larvae from the Salish Sea, Gulf of Maine, and North Sea, respectively  
290 (Supplemental Figure 16). When clustered by bacterial classes, these ‘core’ communities  
291 associated with *S. droebachiensis* larvae, individuals from the North Sea primarily  
292 included  $\alpha$ -proteobacteria (41.8%; Phylum: Proteobacteria),  $\gamma$ -proteobacteria (34.8%;  
293 Phylum: Proteobacteria), and Flavobacteriia (20.9%; Phylum: Bacteroidetes), while  
294 larvae from the Gulf of Maine primarily associated with  $\gamma$ -proteobacteria (57.0%),  $\alpha$ -  
295 proteobacteria (17.4%), and Flavobacteriia (17.1%), and larvae from the Salish Sea

296 associate with Flavobacteriia (67.3%) and  $\alpha$ -proteobacteria (30.0%) (Supplemental  
297 Figure 16).

298

### 299 *Predicted community function and representative taxa*

300 Similar to the 16S rRNA assays, PICRUSt-generated metagenomic gene profiles  
301 of the full (ANOVA,  $p < 0.0001$ ; Figure 4A) and shared (ANOVA,  $p < 0.0001$ ; Figure 4B)  
302 bacterial community associated with *S. droebachiensis* larvae were specific to urchin  
303 biogeography. Predicted gene content of PICRUSt-generated metagenomes were, on  
304 average, ~55.1% metabolism, ~17.9% genetic information processing, ~12.5%  
305 environmental information processing, and ~7.2% cellular processes and signaling  
306 (Supplemental Figures 17-18). Of these, total gene content was significantly different  
307 between locations for metabolism (ANOVA,  $p < 0.0001$ ), cellular processes (ANOVA,  
308  $p < 0.0001$ ), and cellular processes and signaling (ANOVA,  $p < 0.0001$ ) (Supplemental  
309 Figure 17-18). Moreover, of only the shared or 'core' community ~55.8% metabolism,  
310 ~17.3% genetic information processing, ~12.8% environmental information processing,  
311 and ~6.8% cellular processes and signaling (Supplemental Figure 19-20), with total gene  
312 content being significantly different between locations for metabolism (ANOVA,  
313  $p < 0.0001$ ), cellular processes (ANOVA,  $p < 0.0001$ ), and cellular processes and signaling  
314 (ANOVA,  $p < 0.0001$ ).

315 More than half of the gene content of the predicted *S. droebachiensis* larval  
316 metagenome was related to metabolism (Supplemental Figures 17-18). Several of the  
317 bacterial classes from the Salish Sea, Gulf of Maine, and North Sea are predicted to  
318 contribute to metabolism. For *S. droebachiensis* larvae from the Salish Sea this group of

319 bacteria primarily included the  $\alpha$ -proteobacteria (41.5%),  $\gamma$ -proteobacteria (29.7%), and  
320 Flavobacteriia (21.8%); larvae from the Gulf of Maine primarily included  $\alpha$ -  
321 proteobacteria (41.9%),  $\gamma$ -proteobacteria (39.1%), Flavobacteriia (16.5%); and larvae  
322 from the North Sea primarily included  $\gamma$ -proteobacteria (40.5%),  $\alpha$ -proteobacteria  
323 (29.8%), and Flavobacteriia (25.8%) (Figure 6).

324

## 325 **Discussion**

326 Comparisons of the bacterial communities associated with *S. droebachiensis*  
327 larvae across dietary treatments and host biogeography suggests three primary findings.  
328 First, the composition of the bacterial community associated with *S. droebachiensis*  
329 larvae is best correlated with location. Second, for each of the geographical regions,  
330 urchin larvae associated with a microbial community specific to phenotype,  
331 developmental stage, and dietary state. Lastly, the predicted metagenomic profiles are  
332 site-specific and primarily related to metabolism.

333 Marine invertebrate larvae experience a feeding environment that varies in space,  
334 time, and composition (Bidigare and Ondrusek 1996, Chevez et al 1996, Cloern and  
335 Jassby 2010, Milici et al 2016, Needham and Fuhrman 2016). In response to this  
336 variation, planktonic larvae can arrest their development and/or increase the frequency of  
337 encounter rates by enlarging their feeding structure (Boidron-Metairon 1988, Byrne et al  
338 2008, Carrier et al 2015, Carrier and Reitzel 2018, Hart and Strathmann 1994, McAlister  
339 and Miner 2018, Miner 2004, Miner 2011, Soars et al 2009). Plasticity in development  
340 and morphology have historically been viewed as a means for the host to acclimate  
341 (Bradshaw 1965, Hart and Strathmann 1994, McAlister and Miner 2018, Miner 2011,

342 Soars et al 2009, West-Eberhard 2003). Recent work suggests this response is also linked  
343 to the associated bacterial communities (Carrier and Reitzel 2018).

344 Inter-population comparisons of the dynamics of the bacterial community  
345 associated with *S. droebachiensis* larvae suggest three additional, not mutually exclusive  
346 inferences. First, composition of the bacterial communities is seemingly a product of the  
347 host feeding environment. Second, while both community composition and predicted  
348 functional profiles are dynamic across and specific to host feeding environment, the  
349 functional profiles are more informative for understanding hologenomic acclimation.  
350 Third, urchin larval holobionts may be locally adapted. Of these, the data presented here  
351 largely support the first inference, while the latter two are supported but require specific  
352 validation (*e.g.*, using molecular, genomic, and physiological assays and manipulations  
353 (Williams and Carrier 2018).

354 Population-specific bacterial communities is an emerging theme of animal-  
355 microbiome ecology (Dishaw et al 2014, Huang et al 2018, Marino et al 2017, Marzinelli  
356 et al 2015, Mortzfeld et al 2015). For the three populations of *S. droebachiensis* used  
357 here, the bacterial communities were region specific, with Gulf of Maine and North Sea  
358 individuals being more similar to each other than to Salish Sea larvae. The environmental  
359 conditions of these regions are different, and the selective pressures on the microbial  
360 partners, larva, and holobiont likely vary (Bordenstein and Theis 2015). Differential  
361 selection on multiple components of the *S. droebachiensis* larval holobiont may result in  
362 local adaption (Pespeni et al 2013, Sanford and Kelly 2011). The feeding environment-  
363 specific differences in the microbial community and predicted metagenomic gene profiles  
364 are suggestive of potential adaptation, where the functional microbial community may aid



365 in acclimating to unique oceanographic conditions of these three *S. droebachiensis* larval  
366 populations face.

367 Previous studies on the populations of *S. droebachiensis* larvae documented that  
368 phenotypic traits varied across host geography. Manier and Palumbi (2008), for example,  
369 reported significant differences in sperm morphology between urchins across this spatial  
370 scale and found evidence of strong directional selection for sperm traits between  
371 locations, particularly between *S. droebachiensis* in the Pacific and Western Atlantic.  
372 Population genetic studies of *S. droebachiensis*, on the other hand, show significantly  
373 higher  $F_{ST}$  values between the Eastern and Western Atlantic than the Pacific and Western  
374 Atlantic due to more frequent genetic exchange through the Bering Strait (Addison and  
375 Hart 2004, Biermann et al 2003, Manier and Palumbi 2008, Palumbi and Wilson 1990).  
376 Consistent with sperm morphology, the population-specific differences in bacterial  
377 communities and predicted metagenome is suggestive of environmental influence  
378 shaping this variation over, perhaps, the last few hundred thousand years. Future  
379 population genomic studies of *S. droebachiensis* should identify outlier loci that correlate  
380 with specific differences in OTUs and characterize the larval metagenome to provide a  
381 window into how animal genetic variation and the environmental conditions may shape  
382 the associated microbial community.

383 A growing body of literature suggests that planktotrophic larvae utilize diverse  
384 ‘alternative’ nutritional resources (Feehan et al 2018, Manahan et al 1993, Rivkin et al  
385 1986). Based on our predicted metagenomic gene profiles, we propose that planktotrophic  
386 larvae are aided by metabolites derived from their bacterial symbionts. This is of  
387 particular importance because larvae often inhabit food-limited environments (Fenaux et

388 al 1994, Olson and Olson 1989, Pauley et al 1985). To decrease mortality due to  
389 starvation (Morgan 1995, Rumrill 1990, Young and Chia 1987), a metabolic input from  
390 the symbiont community may serve as a physiological buffer and complement metabolic  
391 depression induced by diet-restriction (Carrier et al 2015).

392 Our comparisons of the bacterial communities associated with *S. droebachiensis*  
393 larvae suggest that geographic location better correlated with community composition  
394 than local biological (*e.g.*, phenotype) and ecological variation (*e.g.*, diet quantity). This  
395 type of specific comparison suggests that in studying the dynamics of animal—and  
396 perhaps plant—interactions with their associated bacterial community, location may drive  
397 the taxonomic profiles, and that in transitions towards functional or predicted functional  
398 comparisons, the potential for local adaptation should be considered (Kelly et al 2014,  
399 Pespeni et al 2013, Sanford and Kelly 2011).

400

#### 401 **Conflict of Interest**

402 The authors declare that they have no conflict of interest.

403

#### 404 **Acknowledgements**

405 We thank the staffs of the Friday Harbor Laboratories, Darling Marine Center,  
406 and Sven Lovén Centre for Marine Infrastructure for facility access and logistical  
407 assistance; Jason Hodin and Billie Swalla for providing laboratory space; Richard  
408 Strathmann for collection assistance; Daniel Janies for sequencing resources; Karen  
409 Lopez for technical assistance with sequencing; and Jason Macrander for bioinformatics  
410 assistance.

411 T.J.C. was supported by an NSF Graduate Research Fellowship, Charles Lambert  
412 Memorial Endowment fellowship from the Friday Harbor Laboratories, and a Sigma Xi  
413 Grants-in-Aid of Research grant; S.D. was funded by the Centre for Marine Evolutionary  
414 Biology and supported by a Linnaeus grant from the Swedish Research Councils VR and  
415 Formas; and A.M.R. was supported by NSF DEB1545539 and Human Frontier Science  
416 Program Award RGY0079/2016.  
417

418 **Figure and Table Legends**

419

420 **Figure 1.** Location of *Strongylocentrotus droebachiensis* experiments. Cartoon  
421 representation of adult populations and the geographical distribution for where  
422 differential feeding experiments were conducted.

423

424 **Figure 2.** Similarity of the microbial communities associated with *Strongylocentrotus*  
425 *droebachiensis* larvae between sites. Community similarity of the *S. droebachiensis*  
426 larval microbiome between three geographic locations, independent of phenotype,  
427 developmental stage, and dietary state when considering only taxa (A) and taxa and their  
428 relative abundance (B).

429

430 **Figure 3.** Similarity of the shared bacterial OTUs associated with *Strongylocentrotus*  
431 *droebachiensis* larvae between sites. Community similarity of the bacterial OTUs found  
432 in at least a single sample of *S. droebachiensis* larvae from each of the three sites of  
433 interest. Comparisons were made between three geographic locations, and independent of  
434 phenotype, developmental stage, and dietary state when considering only taxa (A) and  
435 taxa and their relative abundance (B).

436

437 **Figure 4.** Similarity of the predicted *Strongylocentrotus droebachiensis* larval  
438 metagenome at each site. Community similarity of the gene profiles of the  
439 *Strongylocentrotus droebachiensis* larval metagenome as predicted by PICTUS.

440

441 **Figure 5.** Bacterial taxa of predicted metabolic function. Relative proportions of bacterial  
442 classes linked to the predicted metabolic functionality of the *Strongylocentrotus*  
443 *droebachiensis* larval metagenome, as predicted by PICTUS.

444

445 **Table 1.** Alpha diversity indices of the microbial communities associated with  
446 *Strongylocentrotus droebachiensis* larvae from three geographical locations.

447

448

449 **References**

- 450 Adams DK, Sewell MA, Angerer RC, Angerer LM (2011). Rapid adaptation to food  
451 availability by a dopamine-mediated morphogenetic response. *Nature*  
452 *Communications* **2**: 592.
- 453 Addison JA, Hart MW (2004). Analysis of population genetic structure of the green sea  
454 urchin (*Strongylocentrotus droebachiensis*) using microsatellites. *Marine Biology*  
455 **144**: 243-251.
- 456 Addison JA, Hart MW (2005). Colonization, dispersal, and hybridization influence  
457 phylogeography of North Atlantic sea urchins (*Strongylocentrotus droebachiensis*).  
458 *Evolution* **59**: 532-543.
- 459 Apprill A (2017). Marine animal microbiomes: toward understanding host-microbiome  
460 interactions in a changing ocean. *Frontiers in Marine Science* **4**: 222.
- 461 Bidigare RR, Ondrusek ME (1996). Spatial and temporal variability of phytoplankton  
462 pigment distributions in the central equatorial Pacific Ocean. *Deep Sea Research Part*  
463 *II: Topical Studies in Oceanography* **43**: 809-833.
- 464 Biermann CH, Kessing BD, Palumbi SR (2003). Phylogeny and development of marine  
465 model species: strongylocentrotid sea urchins. *Evolution & Development* **5**: 360-371.
- 466 Boidron-Metairon IF (1988). Morphological plasticity in laboratory-reared echinoplutei  
467 of *Dendraster excentricus* (Eschscholtz) and *Lytechinus variegatus* (Lamarck) in  
468 response to food conditions. *Journal of Experimental Marine Biology and Ecology*  
469 **119**: 31-41.
- 470 Bolger AM, Lohse M, Usadel B (2014). Trimmomatic: A flexible trimmer for Illumina  
471 sequence data. *Bioinformatics* **30**: 2114-2120.

- 472 Bordenstein SR, Theis KR (2015). Host biology in light of the microbiome: ten principles  
473 of holobionts and hologenomes. *PLoS Biol* **13**: e1002226.
- 474 Bradshaw A (1965). Evolutionary significance of phenotypic plasticity in plants.  
475 *Advances in Genetics* **13**: 115-155.
- 476 Burke B, Steinberg P, Rusch D, Kjelleberg S, Thomas T (2011). Bacterial community  
477 assembly based on functional genes rather than species. *P Natl Acad Sci USA* **108**:  
478 14288-14293.
- 479 Byrne M, Sewell MA, Prowse TAA (2008). Nutritional ecology of sea urchin larvae:  
480 influence of endogenous and exogenous nutrition on echinopluteal growth and  
481 phenotypic plasticity in *Tripneustes gratilla*. *Functional Ecology* **22**: 643-648.
- 482 Caporaso JG, Kuczynski J, Stombaugh J, Bittinger K, Bushman FD, Costello EK *et al*  
483 (2010). QIIME allows analysis of high-throughput community sequencing data. *Nat*  
484 *Methods* **7**: 335-336.
- 485 Carrier TJ, King BL, Coffman JA (2015). Gene expression changes associated with the  
486 developmental plasticity of sea urchin larvae in response to food availability.  
487 *Biological Bulletin* **228**: 171-180.
- 488 Carrier TJ, Reitzel AM (2017). The hologenome across environments and the  
489 implications of a host-associated microbial repertoire. *Frontiers in Microbiology* **8**:  
490 802.
- 491 Carrier TJ, Reitzel AM (2018). Convergent shifts in host-associated microbial  
492 communities across environmentally elicited phenotypes. *Nature Communications* **9**:  
493 952.

- 494 Chevez FP, Buck KR, Service SK, Newton J, Barber RT (1996). Phytoplankton  
495 variability in the central and eastern tropical Pacific. *Deep Sea Research Part II:  
496 Topical Studies in Oceanography* **43**: 835-870.
- 497 Cloern JE, Jassby AD (2010). Patterns and scales of phytoplankton variability in  
498 estuarine-coastal ecosystems. *Estuaries and Coasts* **33**: 230-241.
- 499 Comeau AM, Douglas GM, Langille MGI (2017). Microbiome helper: a custom and  
500 streamlined workflow for microbiome research. *mSystems* **2**: e00127-00116.
- 501 Dabdoub SM, Fellows ML, Paropkari AD, Mason MR, Huja SS, Tsigarida AA *et al*  
502 (2016). PhyloToAST: Bioinformatics tools for species-level analysis and  
503 visualization of complex microbial datasets. *Scientific Reports* **6**: 29123.
- 504 David LA, Maurice CF, Carmody RN, Gootenberg DB, Button JE, Wolfe BE *et al*  
505 (2014). Diet rapidly and reproducibly alters the human gut microbiome. *Nature* **505**:  
506 559-564.
- 507 DeWitt TJ, Sih A, Wilson DS (1998). Costs and limits of phenotypic plasticity. *Trends in  
508 Ecology & Evolution* **13**: 77-81.
- 509 Dishaw LJ, Flores-Torres J, Lax S, Gemayel K, Leigh B, Melillo D *et al* (2014). The gut  
510 of geographically disparate *Ciona intestinalis* harbors a core microbiota. *PLoS One* **9**:  
511 e93386.
- 512 Edgar RC, Haas BJ, Clemente JC, Quince C, Knight R (2011). UCHIME improves  
513 sensitivity and speed of chimera detection. *Bioinformatics* **27**: 2194-2200.
- 514 Feehan CJ, Grauman-Boss BC, Strathmann RR, Dethier MN, Duggins DO (2018). Kelp  
515 detritus provides high-quality food for sea urchin larvae. *Limnology and  
516 Oceanography* **63**: 5299-5306.



- 517 Fenaux L, Strathmann MF, Strathmann RR (1994). Five tests of food-limited growth of  
518 larvae in coastal waters by comparison of rates of development and form of  
519 echinoplutei. *Limnology and Oceanography* **39**: 84-98.
- 520 Fraune S, Bosch TCG (2007). Long-term maintenance of species-specific bacterial  
521 microbiota in the basal metazoan *Hydra*. *P Natl Acad Sci USA* **104**: 13146-13151.
- 522 Guillard RRL (ed) (1975) *Culture of phytoplankton for feeding marine invertebrates*.  
523 Plenum Press: New York, USA.
- 524 Hart MW, Strathmann RR (1994). Functional consequences of phenotypic plasticity in  
525 echinoid larvae. *Biological Bulletin* **186**: 291-299.
- 526 Huang B-H, Chang C-W, Huang C-W, Gao J, Liao P-C (2018). Composition and  
527 functional specialists of the gut microbiota of frogs reflect habitat differences and  
528 agricultural activity. *Frontiers in Microbiology* **8**: 2670.
- 529 Kelly LW, Williams GJ, Barott KL, Carlson CA, Dinsdale EA, Edwards RA *et al* (2014).  
530 Local genomic adaptation of coral reef-associated microbiomes to gradients of natural  
531 variability and anthropogenic stressors. *P Natl Acad Sci USA* **111**: 10227-10232.
- 532 Klindworth A, Pruesse E, Schweer T, Peplies J, Quast C, Horn M *et al* (2013).  
533 Evaluation of general 16S ribosomal RNA gene PCR primers for classical and next-  
534 generation sequencing-based diversity studies. *Nucleic Acids Research* **41**: e1.
- 535 Kohl KD, Dearing MD (2012). Experience matters: prior exposure to plant toxins  
536 enhances diversity of gut microbes in herbivores. *Ecol Lett* **15**: 1008-1015.
- 537 Kohl KD, Amaya J, Passemant CA, Dearing MD, McCue MD (2014). Unique and shared  
538 responses of the gut microbiota to prolonged fasting: a comparative study across five  
539 classes of vertebrate hosts. *FEMS Microbiol Ecol* **90**: 883-894.

- 540 Kohl KD, Carey HV (2016). A place for host-microbe symbiosis in the comparative  
541 physiologist's toolbox. *Journal of Experimental Biology* **219**: 3496-3504.
- 542 Langille MGI, Zaneveld J, Caporaso JG, McDonald D, Knights D, Reyes JA *et al* (2013).  
543 Predictive functional profiling of microbial communities using 16S rRNA marker  
544 gene sequences. *Nat Biotechnol* **31**: 814-821.
- 545 Louca S, Jacques SMS, Pires APF, Leal JS, Srivastava DS, Parfrey LW *et al* (2016).  
546 High taxonomic variability despite stable functional structure across microbial  
547 communities. *Nature Ecology & Evolution* **1**: 15.
- 548 Lozupone C, Knight R (2005). UniFrac: a new phylogenetic method for comparing  
549 microbial communities. *Applied and Environmental Microbiology* **71**: 8228-8235.
- 550 Macke E, Tasiemski A, Massol F, Callens M, Decaestecker E (2016). Life history and  
551 eco-evolutionary dynamics in light of the gut microbiota. *Oikos* **126**: 508-531.
- 552 Manahan DT, Davis JP, Stephens GC (1993). Bacteria-free sea urchin larvae: selective  
553 uptake of neutral amino acids from seawater. *Science* **220**: 204-206.
- 554 Manier MK, Palumbi SR (2008). Intraspecific divergence in sperm morphology of the  
555 green sea urchin, *Strongylocentrotus droebachiensis*: implications for selection in  
556 broadcast spawners. *BMC Evolutionary Biology* **8**: 283.
- 557 Marino CM, Pawlik JR, López-Legentil S, Erwin PM (2017). Latitudinal variation in the  
558 microbiome of the sponge *Ircinia campana* correlates with host haplotype but not  
559 anti-predatory chemical defense. *Mar Ecol Prog Ser* **565**: 53-66.
- 560 Marks JA, Biermann CH, Eanes WF, Kryvi H (2008). Sperm polymorphism within the  
561 sea urchin *Strongylocentrotus droebachiensis*: divergence between Pacific and  
562 Atlantic Oceans. *Biological Bulletin* **215**: 115-125.

- 563 Marzinelli EM, Campbell AH, Valdes EZ, Vergés A, S. N, Wernberg T *et al* (2015).  
564 Continental-scale variation in seaweed host-associated bacterial communities is a  
565 function of host condition, not geography. *Environmental Microbiology* **17**: 4078-  
566 4088.
- 567 McAlister JS, Miner BG (2018). Phenotypic plasticity of feeding structures in marine  
568 invertebrate larvae. In: Carrier TJ, Reitzel AM, Heyland A (eds). *Evolutionary*  
569 *Ecology of Marine Invertebrate Larvae*. Oxford University Press: Oxford, UK.
- 570 Milici M, Deng ZL, Tomasch J, Decelle J, Wos-Oxley ML, Wang H *et al* (2016). Co-  
571 occurrence analysis of microbial taxa in the Atlantic Ocean reveals high connectivity  
572 in the free-living bacterioplankton. *Frontiers in Microbiology* **7**: 649.
- 573 Miner BG (2004). Evolution of feeding structure plasticity in marine invertebrate larvae:  
574 a possible trade-off between arm length and stomach size. *Journal of Experimental*  
575 *Marine Biology and Ecology* **315**: 117-125.
- 576 Miner BG, Sultan SE, Morgan SG, Padilla DK, Relyea RA (2005). Ecological  
577 consequences of phenotypic plasticity. *Trends in Ecology & Evolution* **20**: 685-692.
- 578 Miner BG (2011). Mechanisms underlying feeding structure plasticity in echinoderm  
579 larvae. In: Flatt T, Heyland A (eds). *Mechanisms of Life History Evolution*. Oxford  
580 University Press. pp 221-229.
- 581 Moeller AH, Suzuki TA, Lin D, Lacey EA, Wasser SK, Nachman MW (2017). Dispersal  
582 limitation promotes the diversification of the mammalian gut microbiota. *P Natl Acad*  
583 *Sci USA* **114**: 13768-13773.
- 584 Morgan SG (1995). Life and death in the plankton: larval mortality and adaptation. In:  
585 McEdwards L (ed). *Ecology of Marine Invertebrate Larvae*. CRC Press. pp 279-321.

- 586 Mortzfeld BM, Urbanski S, Reitzel AM, Kunzel S, Technau U, Fraune S (2015).  
587 Response of bacterial colonization in *Nematostella vectensis* to development,  
588 environment and biogeography. *Environmental Microbiology* **18**: 1764-1781.
- 589 Needham DM, Fuhrman JA (2016). Pronounced daily succession of phytoplankton,  
590 archaea and bacteria following a spring bloom. *Nature Microbiology* **1**: 16005.
- 591 Olson RR, Olson MH (1989). Food limitation of planktotrophic marine invertebrate  
592 larvae: does it control recruitment success? *Annu Rev Ecol Syst* **20**: 225-247.
- 593 Palumbi SR, Wilson AC (1990). Mitochondrial DNA diversity in the sea urchins  
594 *Strongylocentrotus purpuratus* and *S. droebachiensis*. *Evolution* **44**: 403-415.
- 595 Pantos O, Bongaerts P, Dennis PG, Tyson GW, Hoegh-Guldberg O (2015). Habitat-  
596 specific environmental conditions primarily control the microbiomes of the coral  
597 *Seriatopora hystrix*. *ISME Journal* **9**: 1916-1927.
- 598 Parks DH, Tyson GW, Hugenholtz P, Beiko RG (2014). STAMP: statistical analysis of  
599 taxonomic and functional profiles. *Bioinformatics* **30**: 3123-3124.
- 600 Pauley G, Boring L, Strathmann RR (1985). Food limited growth and development of  
601 larvae: experiments with natural sea water. *Journal of Experimental Marine Biology*  
602 *and Ecology* **93**: 1-10.
- 603 Pespeni MH, Sanford E, Gaylord B, Hill TM, Hosfelt JD, Jaris HK *et al* (2013).  
604 Evolutionary change during experimental ocean acidification. *P Natl Acad Sci USA*  
605 **110**: 6937-6942.
- 606 Rivkin RB, Bosch I, Pearse JS, Lessard EJ (1986). Bacterivory: a novel feeding mode for  
607 asteroid larvae. *Science* **233**: 1311-1314.

- 608 Rosenberg E, Zilber-Rosenberg I (2016). Interaction between the microbiome and diet:  
609 the hologenome concept. *Journal of Nutrition & Food Sciences* **6**: 5.
- 610 Roth-Schulze AJ, Pintado J, Zozaya-Valdés E, Cremades J, Ruiz P, Kjelleberg S *et al*  
611 (2018). Functional biogeography and host specificity of bacterial communities  
612 associated with the Marine green alga *Ulva* spp. *Molecular Ecology* **27**: 1952-1965.
- 613 Rumrill SS (1990). Natural mortality of marine invertebrate larvae. *Ophelia* **32**: 163-198.
- 614 Sanford E, Kelly MW (2011). Local adaptation in marine invertebrates. *Annual Review of*  
615 *Marine Science* **3**: 509-535.
- 616 Scheibling RE, Hatcher BG (2013). *Strongylocentrotus droebachiensis*. In: Lawrence JM  
617 (ed). *Sea Urchins: Biology and Ecology*. Academic Press: San Diego, CA.
- 618 Schlichting CD, Smith H (2002). Phenotypic plasticity: linking molecular mechanisms  
619 with evolutionary outcomes. *Evol Ecol* **16**: 189-211.
- 620 Schmitt S, Tsai P, Bell J, Fromont J, Ilan M, Lindquist N *et al* (2012). Assessing the  
621 complex sponge microbiota: core, variable and species-specific bacterial communities  
622 in marine sponges. *ISME Journal* **6**: 564-576.
- 623 Schneider C, Rasband W, Eliceiri K (2012). NIH Image to ImageJ: 25 years of image  
624 analysis. *Nat Methods* **9**: 671-675.
- 625 Shapira M (2016). Gut microbiotas and host evolution: scaling up symbiosis. *Trends in*  
626 *Ecology & Evolution* **31**: 539-549.
- 627 Soars NA, Prowse TAA, Byrne M (2009). Overview of phenotypic plasticity in echinoid  
628 larvae, ‘*Echinopluteus transversus*’ type vs. typical echinoplutei. *Mar Ecol Prog Ser*  
629 **383**: 113-125.

- 630 Sonnenburg ED, Smits SA, Tikhonov M, Higginbottom SK, Wingreen NS, Sonnenburg  
631 JL (2016). Diet-induced extinctions in the gut microbiota compound over generations.  
632 *Nature* **529**: 212-U208.
- 633 Sterns S (1989). The evolutionary significance of phenotypic plasticity. *BioScience* **39**:  
634 436-445.
- 635 Strathmann MF (1987). *Reproduction and development of marine invertebrates of the*  
636 *northern Pacific coast: data and methods for the study of eggs, embryos, and larvae.*  
637 University of Washington Press.
- 638 Theis KR, Dheilly NM, Klassen JL, Brucker RM, Baines JF, Bosch TCG *et al* (2016).  
639 Getting the hologenome concept right: An eco-evolutionary framework for hosts and  
640 their microbiomes. *mSystems* **1**: e00028-00016.
- 641 Vazquez-Baeza Y, Pirrung M, Gonzalez A, Knight R (2013). EMPeror: a tool for  
642 visualizing high-throughput microbial community data. *Gigascience* **2**: 16.
- 643 West-Eberhard M (2003). *Developmental Plasticity and Evolution*. Oxford University  
644 Press: Oxford, UK.
- 645 Williams EA, Carrier TJ (2018). An -omics perspective on marine invertebrate larvae. In:  
646 Carrier TJ, Reitzel AM, Heyland A (eds). *Evolutionary Ecology of Marine*  
647 *Invertebrate Larvae*. Oxford University Press: Oxford, UK. pp 288-304.
- 648 Young CM, Chia F-S (1987). Abundance and distribution of pelagic larvae as influenced  
649 by predation, behavior, and hydrographic factors. In: Giese AC, Pearse JS, Pearse VB  
650 (eds). *Reproduction of Marine Invertebrates IX. General aspects: seeking unity in*  
651 *diveristy*. Blackwell Scientific Publications: Palo Alto, California.

652 Zhang J, Kobert K, Flouri T, Stamatakis A (2014). PEAR: A fast and accurate Illumina  
653 Paired-End reAd mergeR. *Bioinformatics* **30**: 614-620.  
654 Zilber-Rosenberg I, Rosenberg E (2008). Role of microorganisms in the evolution of  
655 animals and plants: the hologenome theory of evolution. *Fems Microbiol Rev* **32**:  
656 723-735.  
657

Salish Sea  
(48.27, -122.57)

The image shows a grayscale map of the North Atlantic region. Three specific locations are highlighted with green dots and connected to text boxes by black lines. The Salish Sea is located on the west coast of North America. The Gulf of Maine is located on the east coast of North America. The North Sea is located in the North Atlantic Ocean, east of North America and west of Europe.

North Sea  
(59.39, 10.37)

Gulf of Maine  
(44.25, -68.12)



**A**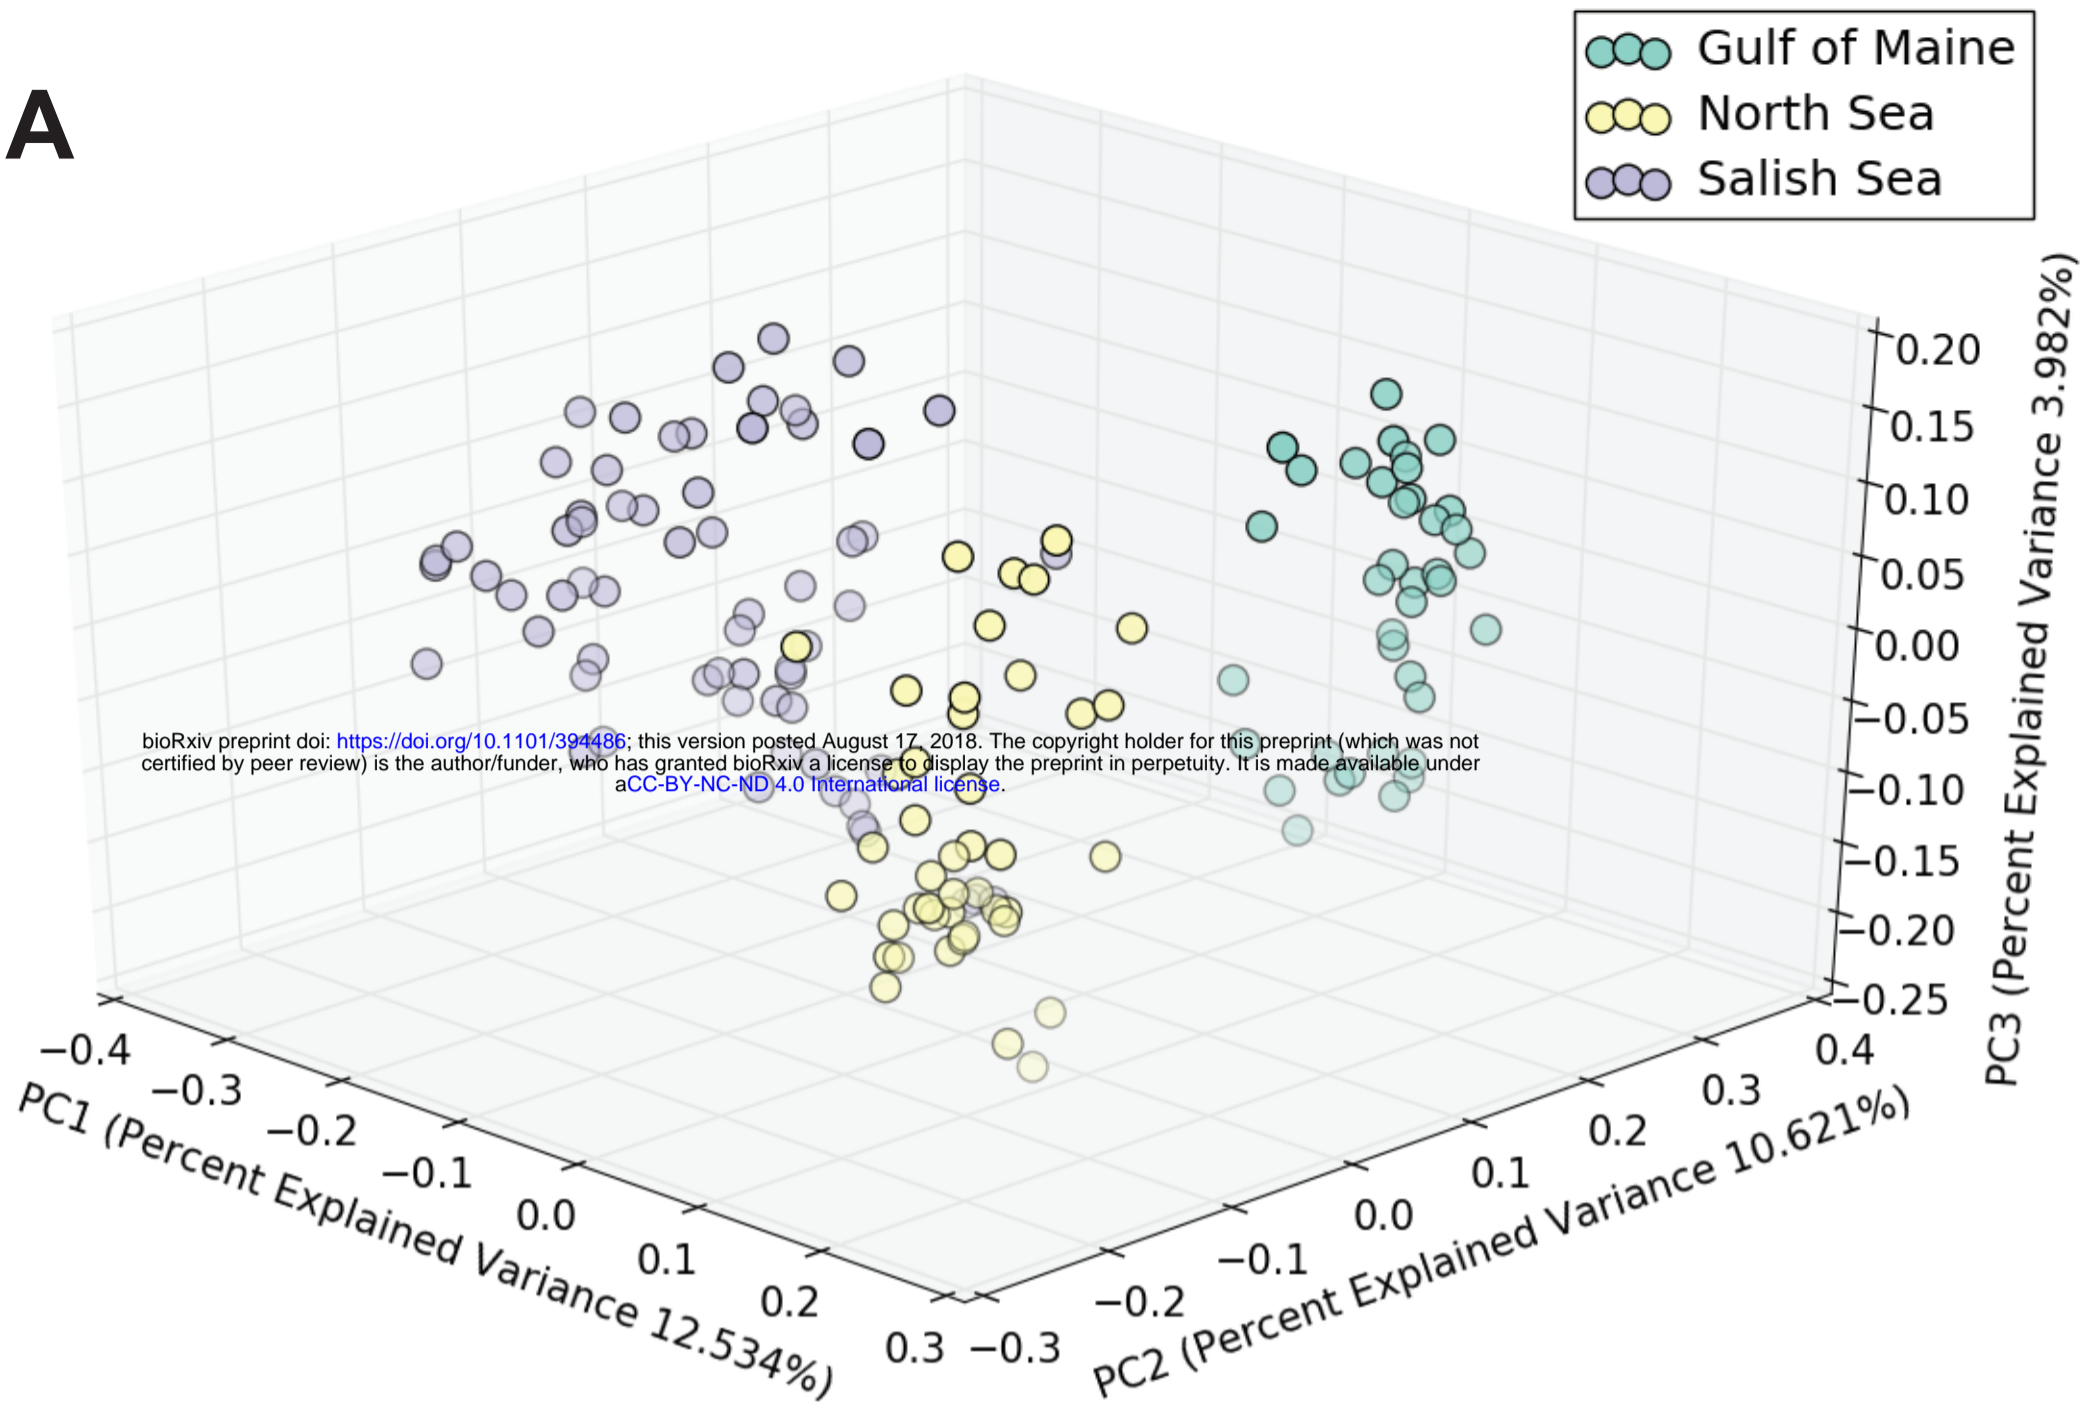**B**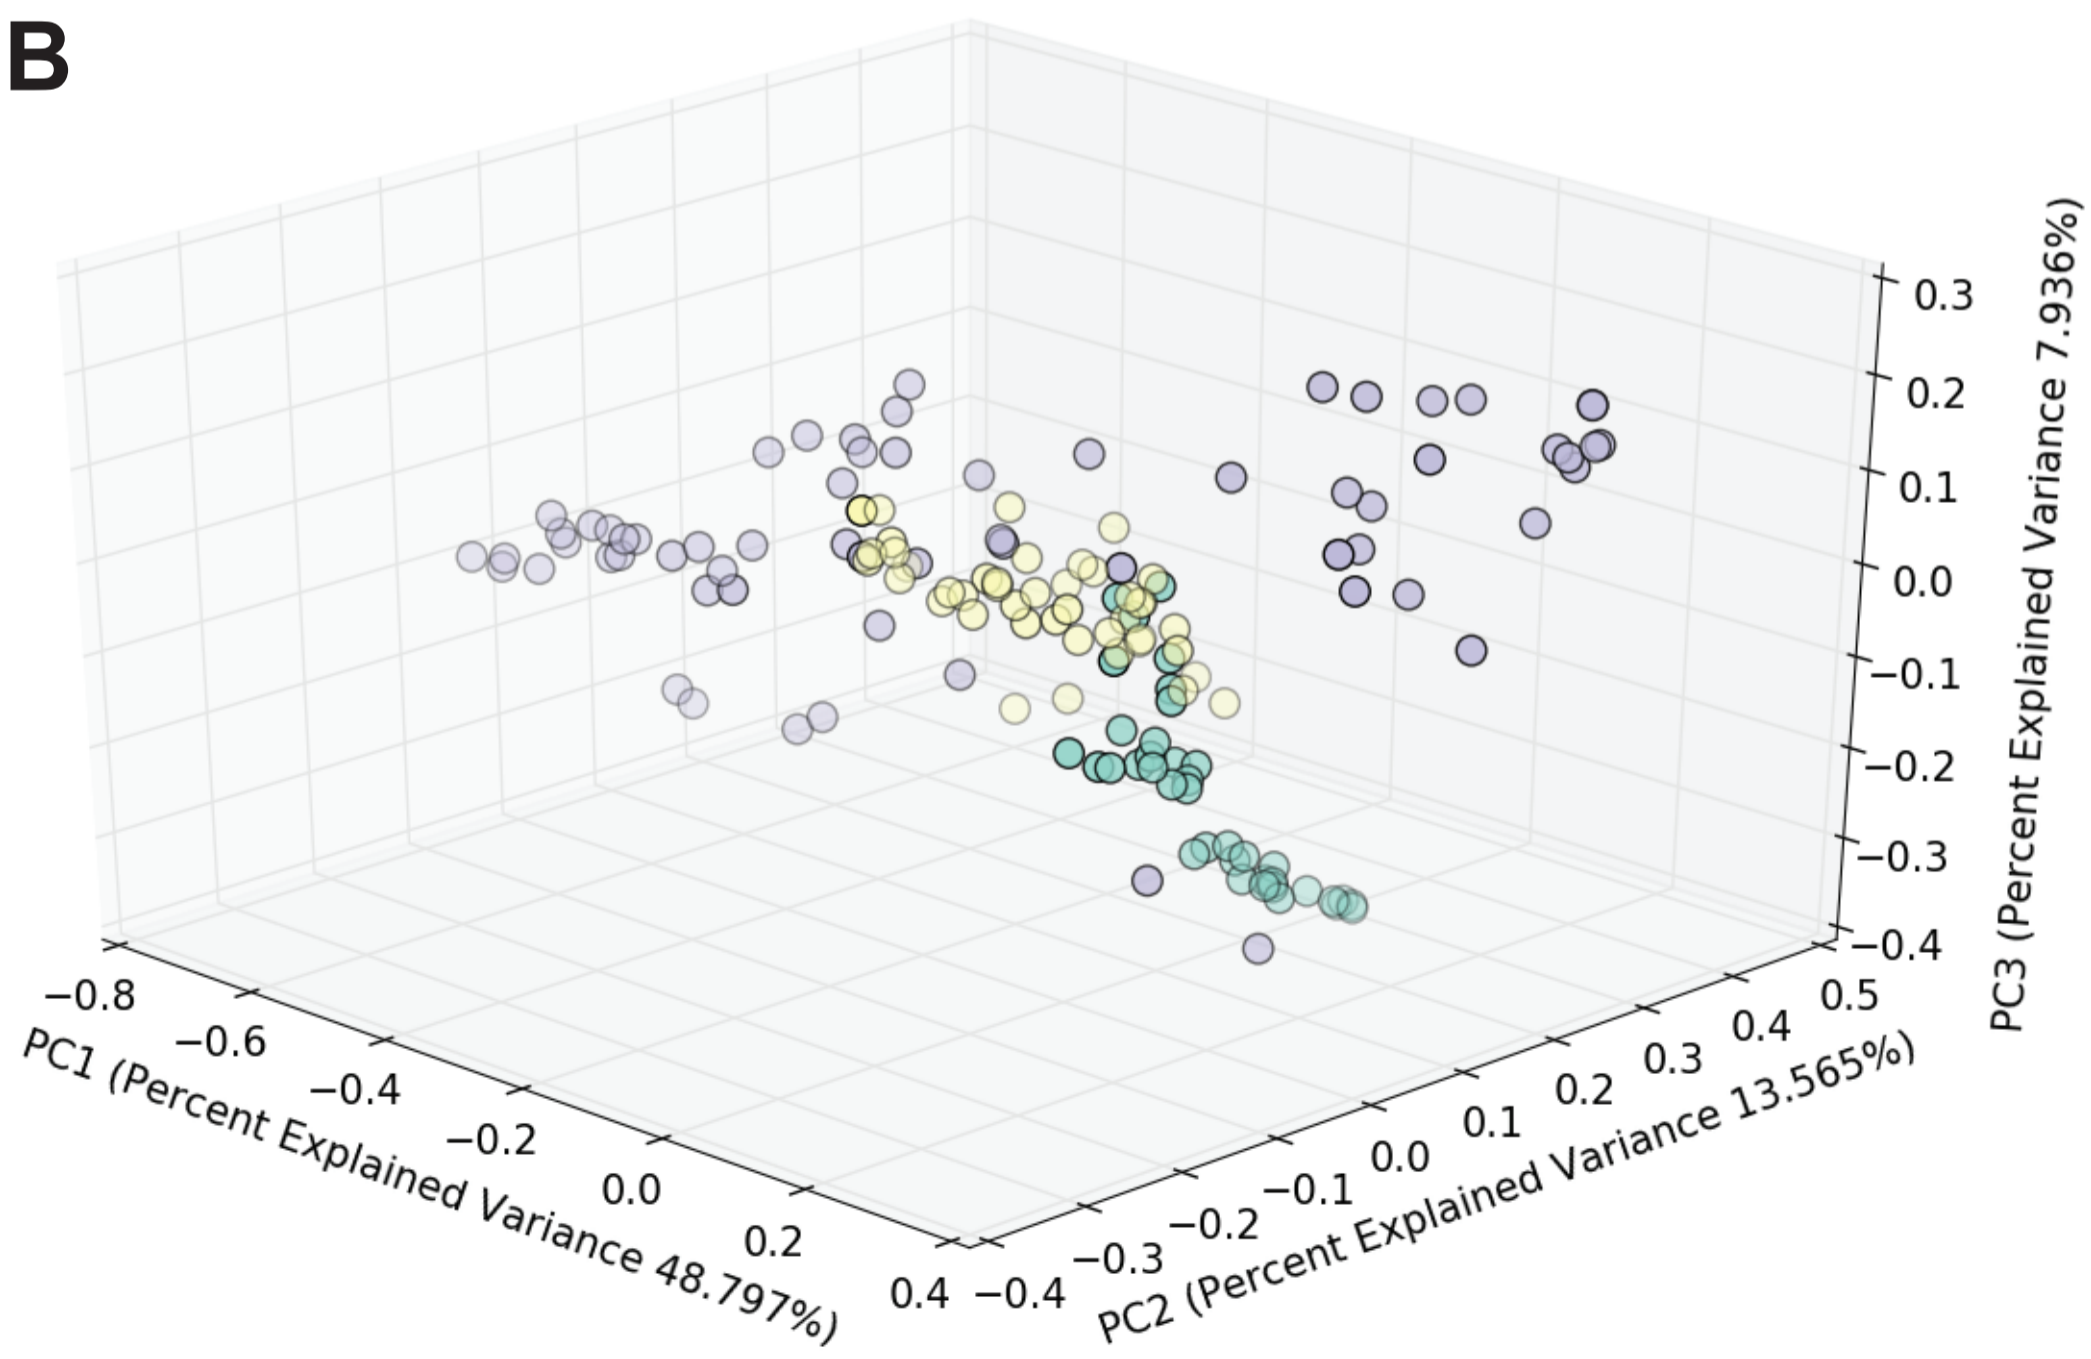

**A**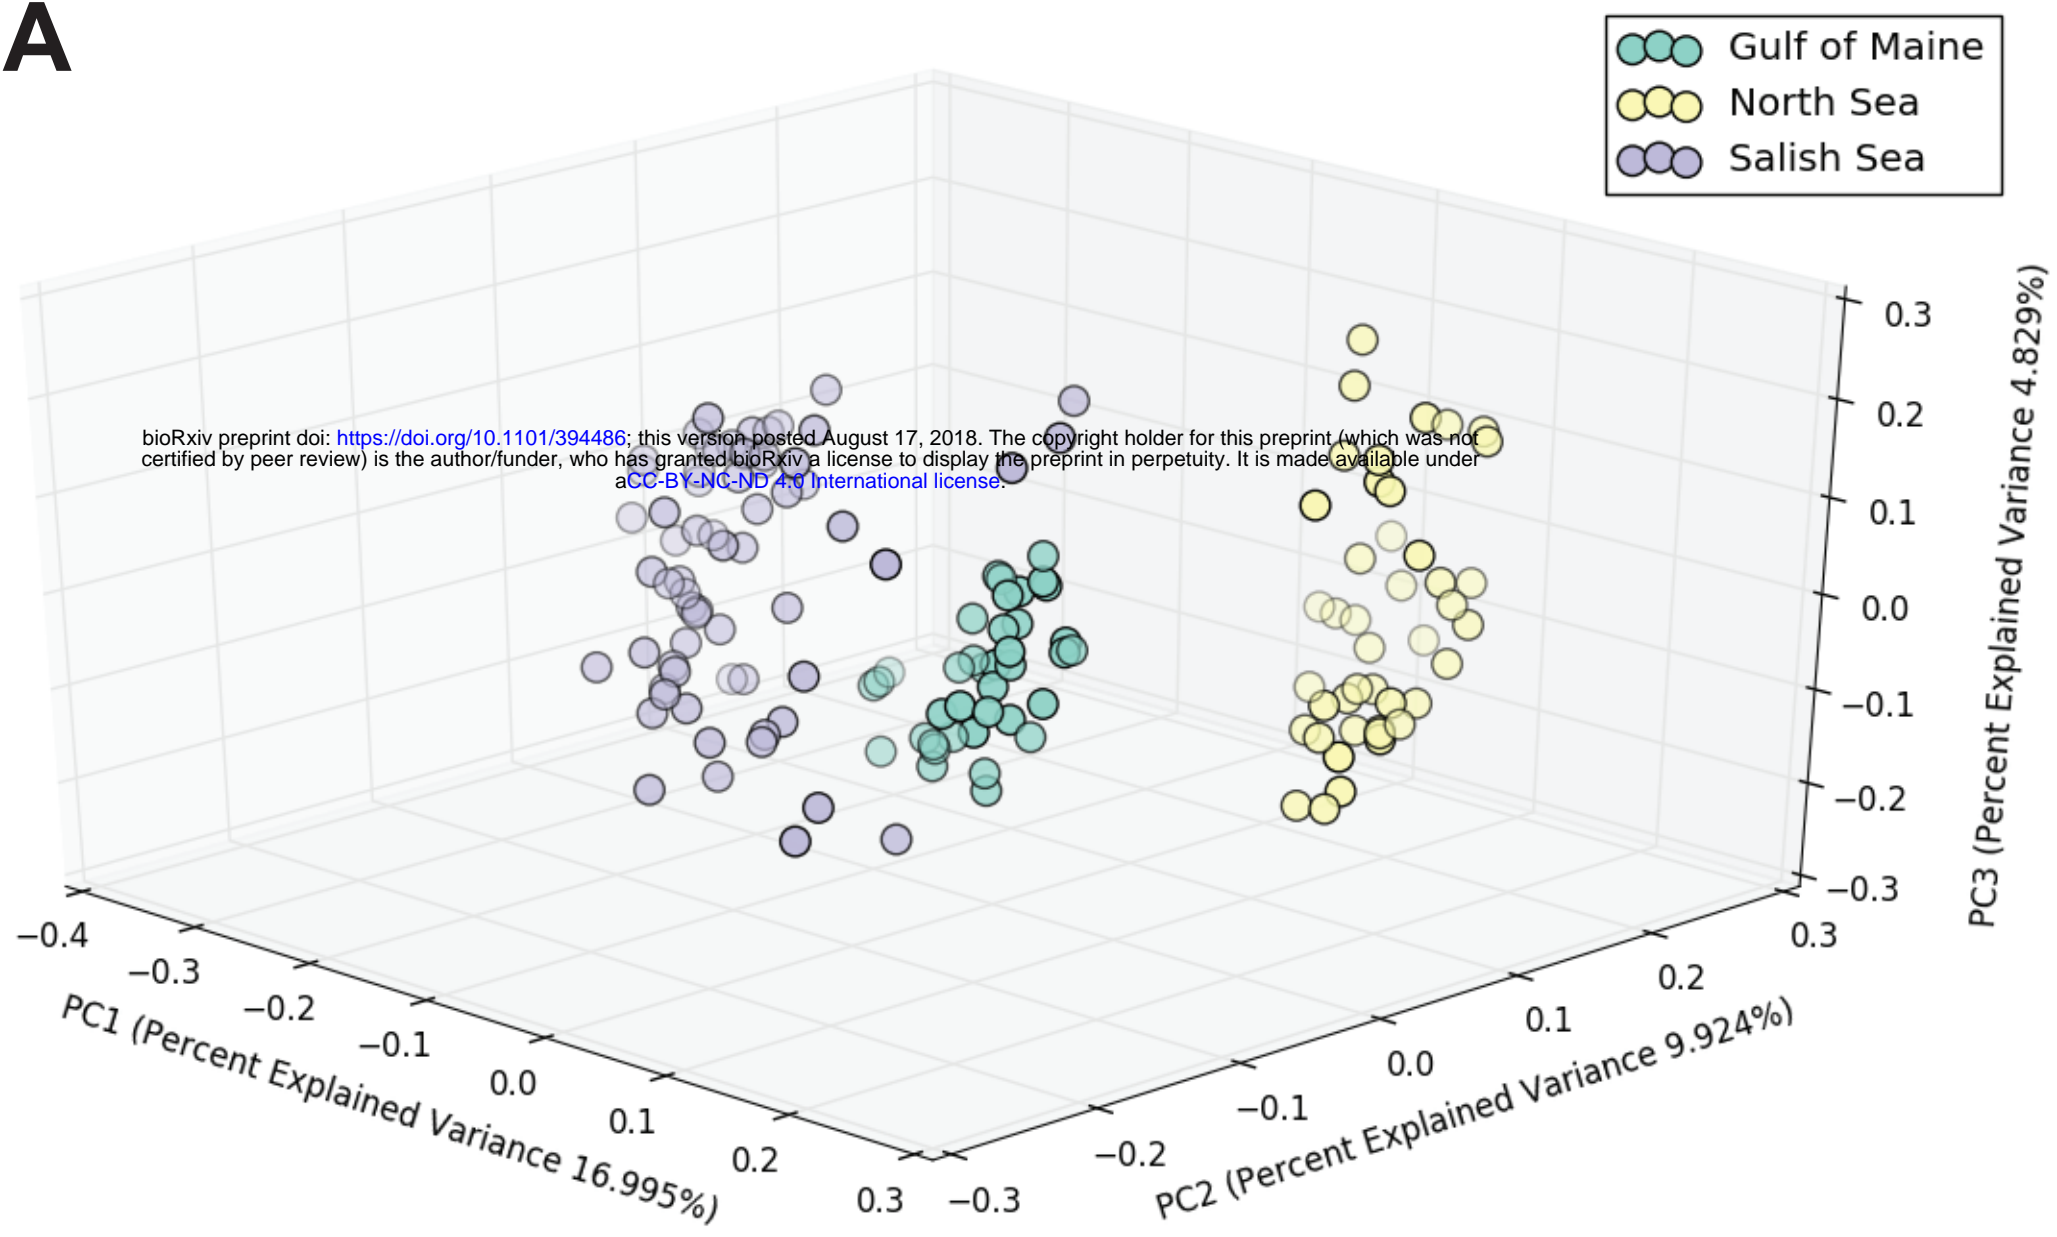**B**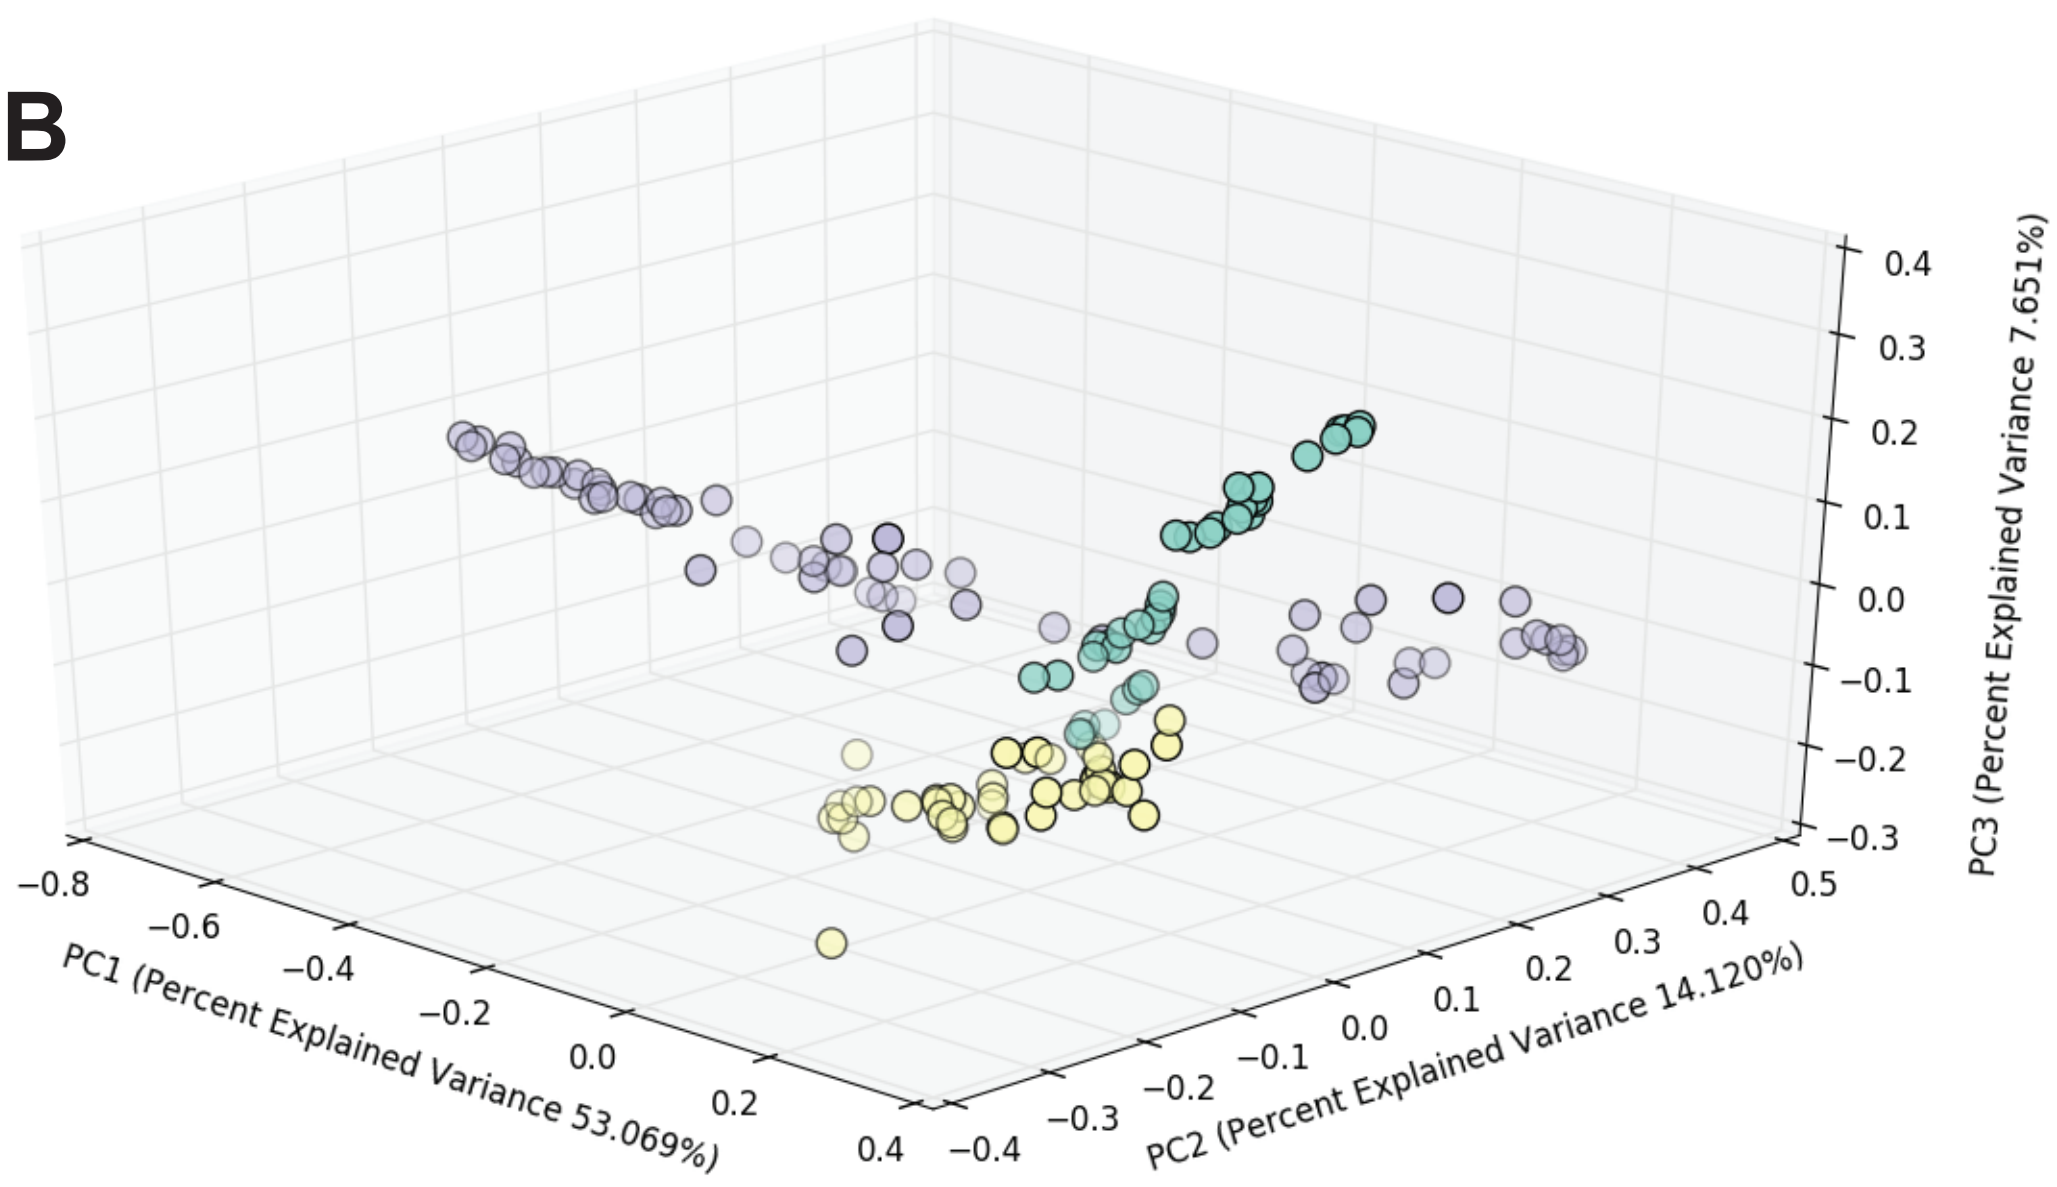

**A**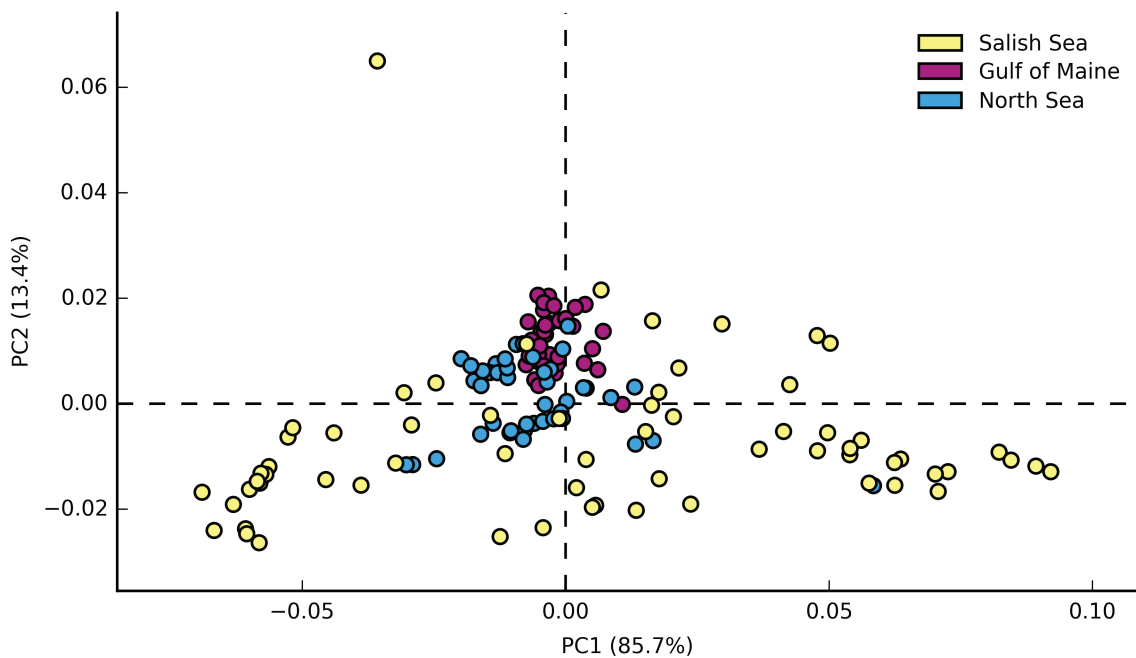**B**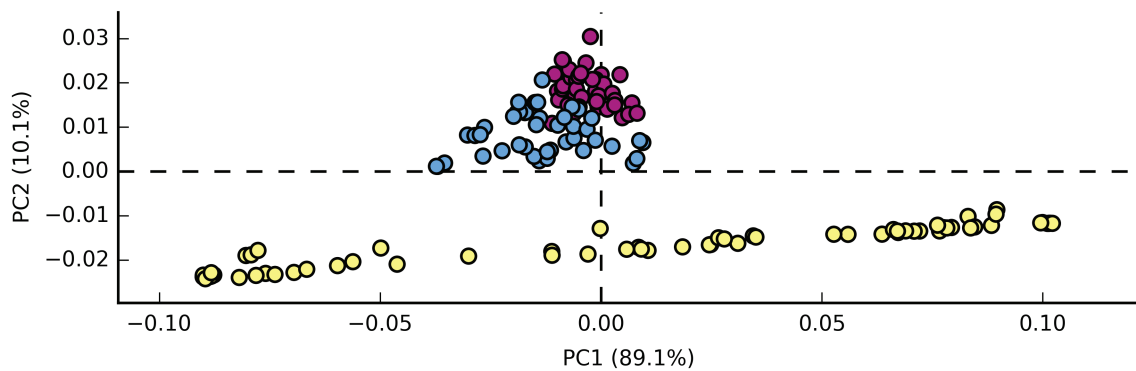

**A**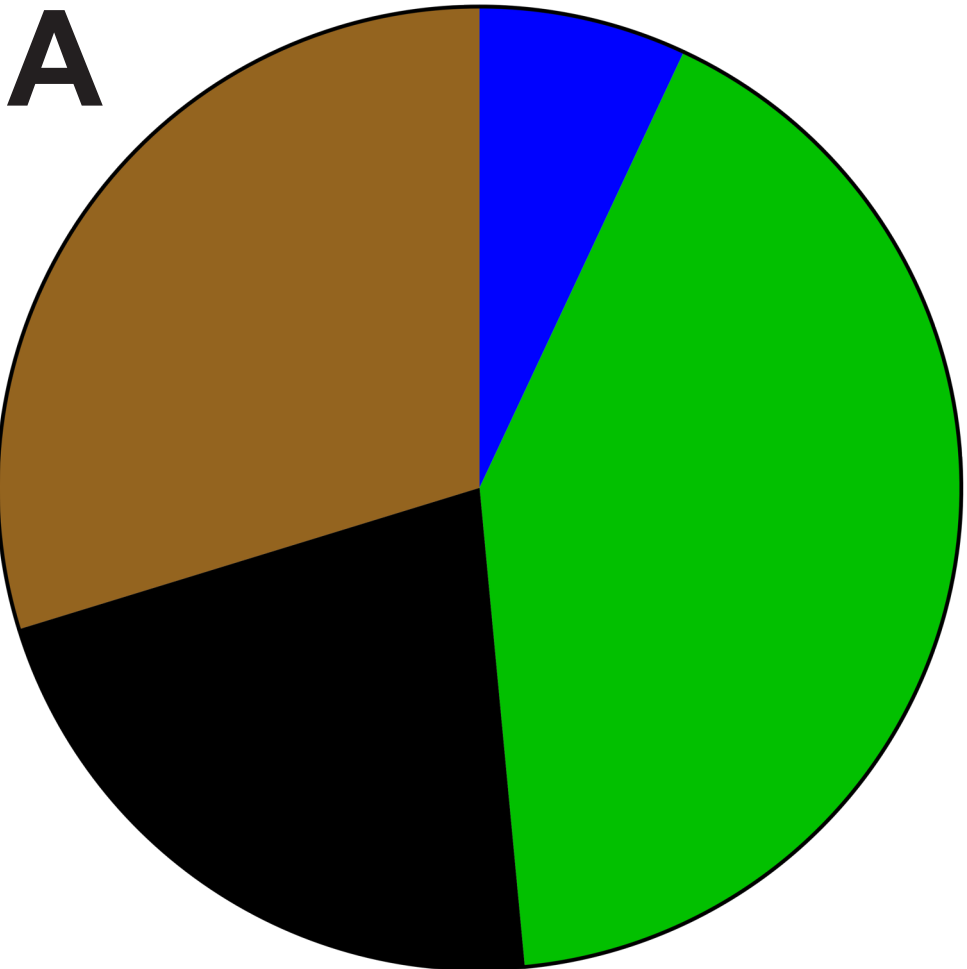**B**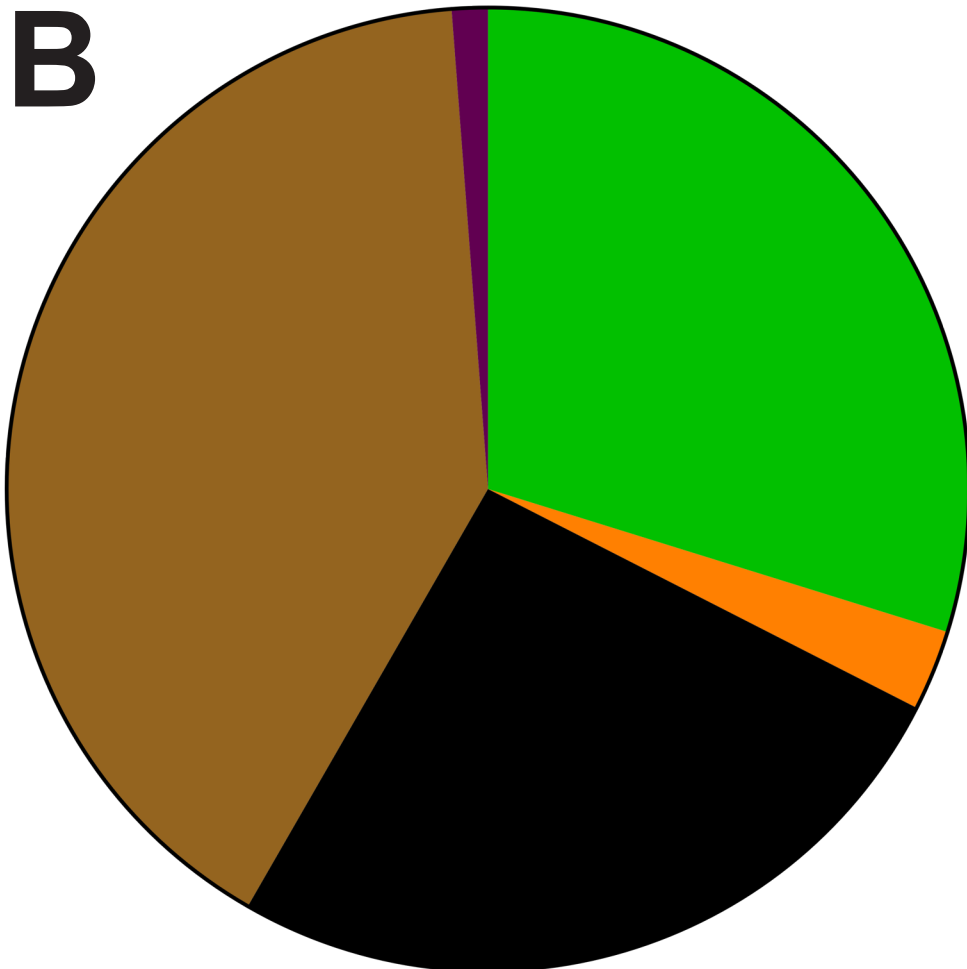**C**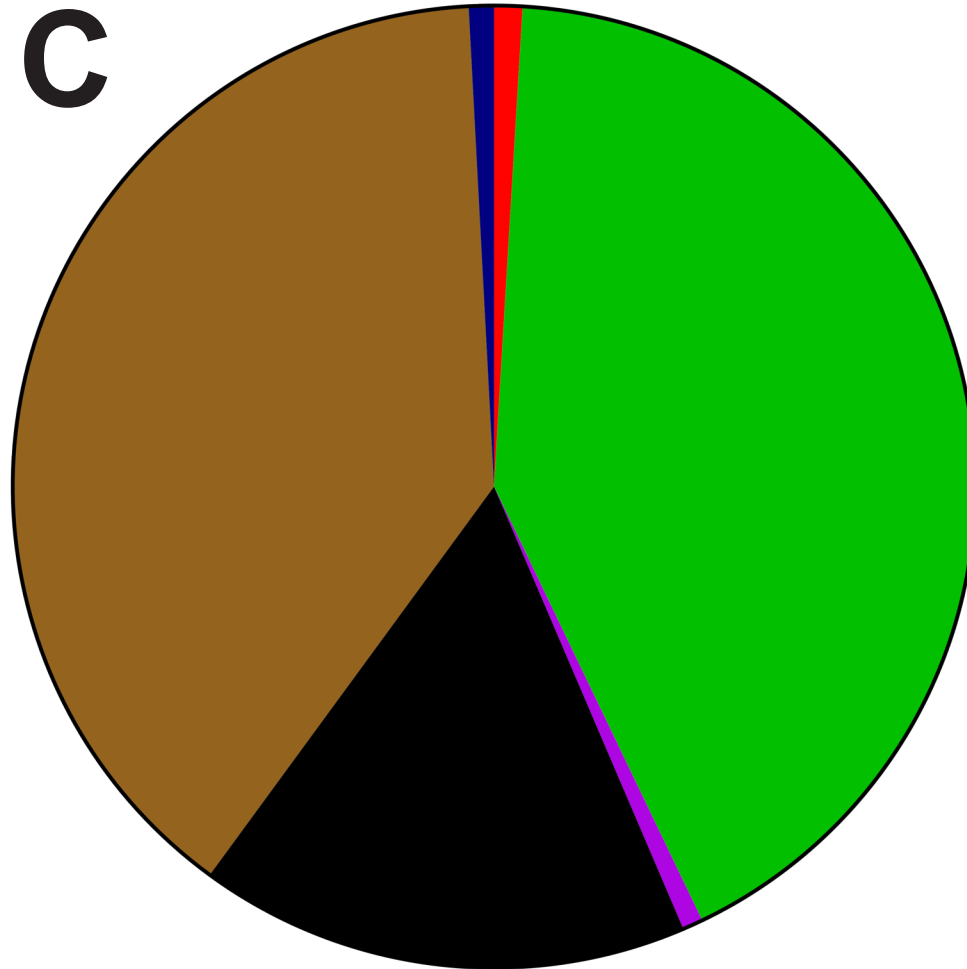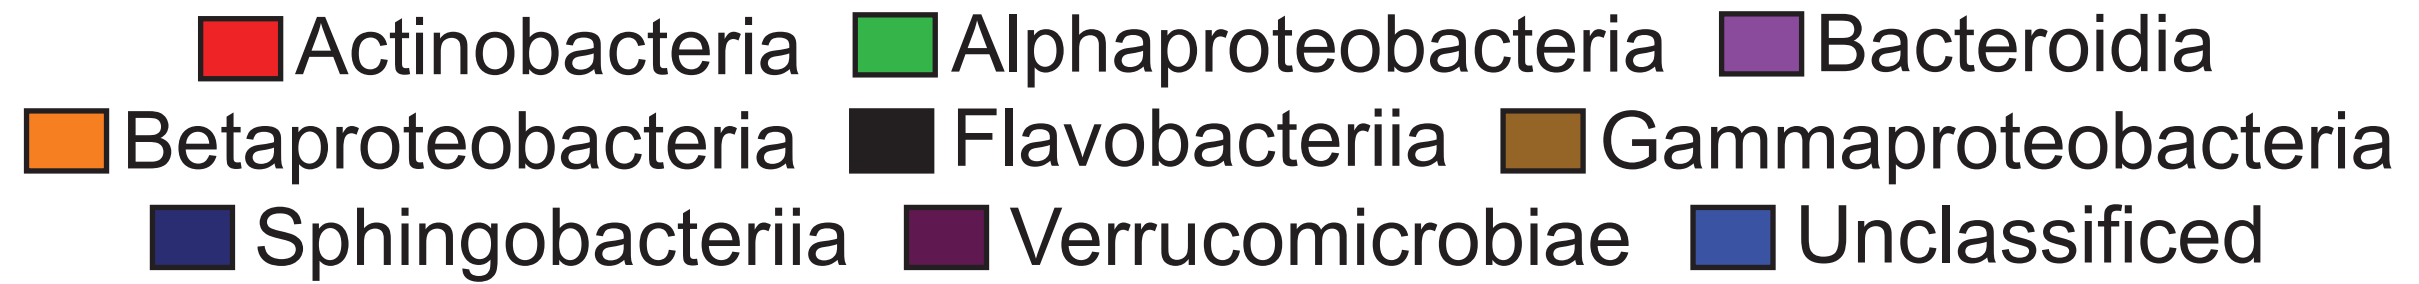

**Table 1.** Alpha diversity indices of the microbial communities associated with *Strongylocentrotus droebachiensis* larvae from three geographical locations.

|                |      | <b>Salish<br/>Sea</b> | <b>Gulf of<br/>Maine</b> | <b>North<br/>Sea</b> | SS       | F-ratio | P                 |
|----------------|------|-----------------------|--------------------------|----------------------|----------|---------|-------------------|
| <b>Fisher</b>  | Mean | 252.3                 | 464.69                   | 347.49               | 1.08E+06 | 81.67   | <b>&lt;0.0001</b> |
|                | SE   | 8.82                  | 13.09                    | 14.65                |          |         |                   |
|                |      | C                     | A                        | B                    |          |         |                   |
| <b>Shannon</b> | Mean | 4.66                  | 7.48                     | 6.71                 | 2.21E+02 | 108.79  | <b>&lt;0.0001</b> |
|                | SE   | 0.02                  | <0.01                    | 0.01                 |          |         |                   |
|                |      | C                     | A                        | B                    |          |         |                   |
| <b>Simpson</b> | Mean | 0.77                  | 0.97                     | 0.95                 | 1.31E+00 | 61.35   | <b>&lt;0.0001</b> |
|                | SE   | <0.01                 | <0.01                    | <0.01                |          |         |                   |
|                |      | B                     | A                        | A                    |          |         |                   |
